# Supplementary material for: Cost-effectiveness of pembrolizumab for treatment of platinum-resistant recurrent or metastatic head and neck squamous cell carcinoma in China: an economic analysis based on a randomised, open-label, phase III trial
Source: PubMed Central journal article supplement — BMJ Open. 2020 Dec 18;10(12):e038867. doi: 10.1136/bmjopen-2020-038867 (PMC7751211; doi:10.1136/bmjopen-2020-038867), 2020-12-18
Supplement: bmjopen-2020-038867.draft_revisions.pdf [file bmjopen-2020-038867.draft_revisions.pdf]

# BMJ Open

BMJ Open is committed to open peer review. As part of this commitment we make the peer review history of every article we publish publicly available.

When an article is published we post the peer reviewers' comments and the authors' responses online. We also post the versions of the paper that were used during peer review. These are the versions that the peer review comments apply to.

The versions of the paper that follow are the versions that were submitted during the peer review process. They are not the versions of record or the final published versions. They should not be cited or distributed as the published version of this manuscript.

BMJ Open is an open access journal and the full, final, typeset and author-corrected version of record of the manuscript is available on our site with no access controls, subscription charges or pay-per-view fees (<http://bmjopen.bmj.com>).

If you have any questions on BMJ Open's open peer review process please email [info.bmjopen@bmj.com](mailto:info.bmjopen@bmj.com)

# BMJ Open

## Cost-Effectiveness of Pembrolizumab for Treatment of Platinum-Resistant Recurrent or Metastatic Head-and-Neck Squamous Cell Carcinoma in China

|                               |                                                                                                                                                                                                                                                                                                                                                                                                           |
|-------------------------------|-----------------------------------------------------------------------------------------------------------------------------------------------------------------------------------------------------------------------------------------------------------------------------------------------------------------------------------------------------------------------------------------------------------|
| Journal:                      | <i>BMJ Open</i>                                                                                                                                                                                                                                                                                                                                                                                           |
| Manuscript ID                 | bmjopen-2020-038867                                                                                                                                                                                                                                                                                                                                                                                       |
| Article Type:                 | Original research                                                                                                                                                                                                                                                                                                                                                                                         |
| Date Submitted by the Author: | 27-Mar-2020                                                                                                                                                                                                                                                                                                                                                                                               |
| Complete List of Authors:     | Xin, Wenxiu; Zhejiang Cancer Hospital, Department of Pharmacy<br>Ding, Haiying; Zhejiang Cancer Hospital, Department of Pharmacy<br>Zheng, Xiaowei; Zhejiang Cancer Hospital, Department of pharmacy<br>Tong, Yinghui; Zhejiang Cancer Hospital, Department of Pharmacy<br>Xu, Gaoqi; Zhejiang Cancer Hospital, Department of Pharmacy<br>Yang, Guonong; Zhejiang Cancer Hospital, Department of Pharmacy |
| Keywords:                     | CLINICAL PHARMACOLOGY, HEALTH ECONOMICS, Head & neck tumours < ONCOLOGY                                                                                                                                                                                                                                                                                                                                   |
|                               |                                                                                                                                                                                                                                                                                                                                                                                                           |

SCHOLARONE™  
Manuscripts

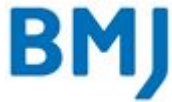

I, the Submitting Author has the right to grant and does grant on behalf of all authors of the Work (as defined in the below author licence), an exclusive licence and/or a non-exclusive licence for contributions from authors who are: i) UK Crown employees; ii) where BMJ has agreed a CC-BY licence shall apply, and/or iii) in accordance with the terms applicable for US Federal Government officers or employees acting as part of their official duties; on a worldwide, perpetual, irrevocable, royalty-free basis to BMJ Publishing Group Ltd ("BMJ") its licensees and where the relevant Journal is co-owned by BMJ to the co-owners of the Journal, to publish the Work in this journal and any other BMJ products and to exploit all rights, as set out in our [licence](#).

The Submitting Author accepts and understands that any supply made under these terms is made by BMJ to the Submitting Author unless you are acting as an employee on behalf of your employer or a postgraduate student of an affiliated institution which is paying any applicable article publishing charge ("APC") for Open Access articles. Where the Submitting Author wishes to make the Work available on an Open Access basis (and intends to pay the relevant APC), the terms of reuse of such Open Access shall be governed by a Creative Commons licence – details of these licences and which [Creative Commons](#) licence will apply to this Work are set out in our licence referred to above.

Other than as permitted in any relevant BMJ Author's Self Archiving Policies, I confirm this Work has not been accepted for publication elsewhere, is not being considered for publication elsewhere and does not duplicate material already published. I confirm all authors consent to publication of this Work and authorise the granting of this licence.

1  
2  
3  
4 **Cost-Effectiveness of Pembrolizumab for Treatment of Platinum-Resistant**  
5 **Recurrent or Metastatic Head-and-Neck Squamous Cell Carcinoma in China**  
6  
7

8  
9 Wenxiu Xin,<sup>1,2,#</sup> Haiying Ding,<sup>1,#</sup> Xiaowei Zheng,<sup>1</sup> Yinghui Tong,<sup>1</sup> Gaoqi Xu,<sup>1</sup>  
10 Guonong Yang\*  
11  
12

13  
14  
15 <sup>1</sup> Department of Pharmacy, Institute of Cancer Research and Basic Medical Sciences of  
16 Chinese Academy of Sciences, Cancer Hospital of University of Chinese Academy of  
17 Sciences, Zhejiang Cancer Hospital, Hangzhou, China  
18  
19

20  
21 <sup>2</sup> Key Laboratory of Head and Neck Translational Research of Zhejiang Province,  
22 Institute of Cancer Research and Basic Medical Sciences of Chinese Academy of  
23 Sciences, Cancer Hospital of University of Chinese Academy of Sciences, Zhejiang  
24 Cancer Hospital, Hangzhou, China  
25  
26  
27  
28

29  
30  
31 #These authors contributed equally to this work  
32

33  
34  
35 \*Corresponding author:

36  
37 Wenxiu Xin, Department of Pharmacy/Key Laboratory of Head and Neck Translational  
38 Research of Zhejiang Province, Institute of Cancer Research and Basic Medical  
39 Sciences of Chinese Academy of Sciences, Cancer Hospital of University of Chinese  
40 Academy of Sciences, Zhejiang Cancer Hospital, No.1 Banshan Road, Hangzhou  
41 310022, China. Email: xinwx@zjcc.org.cn  
42  
43

44  
45  
46 Guonong Yang, Department of Pharmacy/ Key Laboratory of Head and Neck  
47 Translational Research of Zhejiang Province, Institute of Cancer Research and Basic  
48 Medical Sciences of Chinese Academy of Sciences, Cancer Hospital of University of  
49 Chinese Academy of Sciences, Zhejiang Cancer Hospital, No.1 Banshan Road,  
50 Hangzhou 310022, China. Email: yanggn@zjcc.org.cn  
51  
52  
53  
54  
55

56  
57  
58 Word count: 1871  
59  
60

## ABSTRACT

**Objective:** Pembrolizumab was recently demonstrated to have a survival benefit for patients with recurrent or metastatic head-and-neck squamous cell carcinoma (r/mHNSCC). However, the cost-effectiveness of pembrolizumab versus chemotherapy remained uncertain. This analysis aimed to describe the cost-effectiveness of pembrolizumab versus standard-of-care (SOC) therapy in r/mHNSCC in China.

**Methods:** A Markov model consisting of three health states (stable, progressive and dead) was developed to compare the costs and effectiveness of pembrolizumab with SOC in platinum-resistant r/mHNSCC. Model inputs for transition probabilities and toxicity were collected from the KEYNOTE-040 trial, while health utilities were estimated from a literature review. The cost data were acquired for the payer perspectives of China. Costs and outcomes were discounted at an annual rate of 3.0%. Incremental cost-effectiveness ratio (ICER) were calculated as cost per quality-adjusted life years (QALYs). Sensitivity analyses were conducted to test the uncertainties surrounding model parameters.

**Results:** The total mean cost of pembrolizumab versus standard-of-care was US\$37,787 and US\$32,491, respectively. As for effectiveness, pembrolizumab yielded 0.31 QALYs compared with 0.25 QALYs for SOC therapy. The ICER for pembrolizumab was US\$88,271/QALY versus SOC.

**Conclusions:** Pembrolizumab is not likely to be a cost-effective strategy compared with SOC therapy for platinum-resistant r/mHNSCC patients in China.

**Keywords:** Cost-effectiveness, Immunotherapy, Pembrolizumab, head-and-neck squamous cell carcinoma, Markov model

### Strengths and limitations of this study

1. Pembrolizumab was recently approved to have a survival benefit for patients with recurrent or metastatic head-and-neck squamous cell carcinoma (r/mHNSCC). However, the cost-effectiveness of pembrolizumab in treating r/mHNSCC was still unknown.

2. To our knowledge, this is the first cost-effectiveness analysis comparing pembrolizumab with methotrexate, docetaxel, or cetuximab for treating patients with r/mHNSCC.

3. The main limitations of the study are that resource use in clinical trials may not represent resources for real clinical practice since clinical trials were conducted in a selected population meeting inclusion and exclusion criteria.

### **SUBHEADING: *Pembrolizumab cost-effectiveness for Head-and-Neck Squamous Cell Carcinoma***

## **INTRODUCTION**

Head and neck squamous cell carcinoma (HNSCC) represents a major global cause of cancer-associated morbidity and death with a worldwide incidence of 550,000 cases and 380,000 deaths per year.<sup>1 2</sup> After definitive treatment, approximately 30-40% of patients with HNSCC will progress<sup>3 4</sup> and about 50-60% will have recurrent disease.<sup>5</sup> Platinum-based systemic chemotherapy regimens is commonly used in the first-line treatment for patients with recurrent or metastatic HNSCC (r/mHNSCC). For patients with failure of first-line platinum therapy, the commonly used drug is methotrexate.<sup>6</sup> The second-line of paclitaxel or docetaxel has a certain salvage effect if the first-line therapy does not receive the taxane.<sup>7 8</sup> Cetuximab is also suitable for patients who have not been exposed to this drug or have a poor PS score.<sup>9</sup>

Checkpoint inhibitors of the programmed cell death protein 1 (PD-1) have shown impressive effects on a number of cancers.<sup>10-13</sup> In recent years, anti-PD-1 drugs have developed rapidly in advanced HNSCC. The Food and Drug Administration (FDA) of the US continuously approved the indications of pembrolizumab and nivolumab for the treatment of recurrent or metastatic HNSCC. The recently reported KEYNOTE-040<sup>14</sup> study found a survival benefit for patients with platinum-resistant recurrent or metastatic disease who received pembrolizumab . In this clinical trial, patients were randomly assigned to receive pembrolizumab or standard-of-care (SOC) (docetaxel, methotrexate, or cetuximab). The study showed that median overall survival was 8.4

1  
2  
3  
4 months (95% CI: 6.4–9.4) in the pembrolizumab group and 6.9 months (95% CI: 5.9–  
5  
6 8.0) in SOC group. Thus pembrolizumab extended the median overall survival by 1.5  
7  
8 months. Also, patients in pembrolizumab group had a favourable safety profile  
9  
10 compared with patients treated with conventional therapy. Although there is a  
11  
12 significant improvement in the treatment of patients with r/mHNSCC, the prognosis  
13  
14 remains relatively poor and the economic value of pembrolizumab in this population  
15  
16 remains unknown. The objective of our study was to assess the cost-effectiveness of  
17  
18 pembrolizumab compared with standard agents in the treatment of r/mHNSCC to find  
19  
20 the more cost-effective therapy in China.

## 21 **METHODS**

### 22 **Patients and treatments**

23  
24 The target patients in the model were in line with the eligibility criteria for the  
25  
26 randomized, open-label, phase 3 clinical trial (KEYNOTE-040). This included HNSCC  
27  
28 patients that progressed during or after platinum-containing therapy for recurrent and/or  
29  
30 metastatic disease, or whose disease recurred or progressed within 3-6 months of  
31  
32 platinum-containing therapy for locally advanced disease. Patients were randomly  
33  
34 assigned to receive either pembrolizumab or investigator's choice of SOC therapy. The  
35  
36 same treatment mix as in the SOC arm (26.2% methotrexate, 44.4% docetaxel, 29.4%  
37  
38 cetuximab) was assumed in our model without adoptions, as it represents the standard  
39  
40 of care. Patients assigned to pembrolizumab arm received 200 mg every 3 weeks  
41  
42 intravenously. In the SOC arm, patients received 40 mg/m<sup>2</sup> body surface area of  
43  
44 methotrexate per week intravenously (could be increased to 60 mg/m<sup>2</sup> in the absence  
45  
46 of toxicity), 75 mg/m<sup>2</sup> of docetaxel every 3 weeks intravenously, or 250 mg/m<sup>2</sup> of  
47  
48 cetuximab per week intravenously following a loading dose of 400 mg/m<sup>2</sup>. Treatment  
49  
50 continued until progression was confirmed on a scan obtained at least 4 weeks later or  
51  
52 other criteria requiring discontinuation were met.

### 53 **Model Structure**

54  
55 We compared the cost-effectiveness of pembrolizumab with methotrexate, docetaxel,  
56  
57 or cetuximab for patients with platinum-resistant r/mHNSCC. We conducted a Markov  
58  
59 model by TreeAge pro Suite (TreeAge Software Inc, Williamstown, MA, USA) to  
60

1  
2  
3  
4 simulate treatments, adverse events, costs, survival, and quality of life among simulated  
5 patients (Fig. 1). Three mutually exclusive health states, progression-free (stable state),  
6 progressive disease (cancer progression) and death, were included in the state transition  
7 diagram (Fig. 1B). Patients started receiving pembrolizumab or standard chemotherapy  
8 in the stable state, and could stay in or move to progressive disease or death at a cycle  
9 length due to their assigned transition probabilities. The simulation was conducted in  
10 three-week cycles for a period of 30 years during which all patients were expected to  
11 die. Transition probabilities of every state were calculated based on the following  
12 equation:  $P(1 \text{ month}) = 1 - 0.5^{(1/\text{median time to event})}$ . The equation was derived from  $P = 1 -$   
13  $e^{-R}$  and  $R = -\ln(0.5)/(\text{time to event}/\text{number of treatment cycles})$ .<sup>15-17</sup>

### 23 Cost

24 Since the therapeutic drugs were administered weekly or every three weeks in the  
25 KEYNOTE-040 test, the cycle length of our model was three weeks. Therefore, all the  
26 costs we provided were for every three weeks. All aspects of direct medical costs for  
27 treating the disease, including the cost for pembrolizumab or standard therapy, imaging  
28 and laboratory tests, hospitalization, administration for stable state and the cost for  
29 subsequent therapy in disease progressive, were taken into account. Since patients  
30 randomized to the SOC arm received one of three chemotherapy regimens, the drug  
31 acquisition cost was calculated as a weighted average cost based on the patients'  
32 number of each regimen in KEYNOTE-040. In addition, time cost calculated according  
33 to median monthly salary in China were also considered. The incidence of adverse  
34 events comes from clinical trials KEYNOTE-040. Costs due to severe (grade 3-4)  
35 treatment-related adverse events were either derived from the literature<sup>18 19</sup> or  
36 calculated from the perspective of Chinese society. Costs for grade 1-2 adverse events  
37 were deemed to be negligible. All costs in the model were adjusted to US dollars based  
38 on the 2018 average exchange rate (US\$ = CYN 6.6174) and discounted at a rate of 3%  
39 annually (Table 1).

### 56 Utilities and outcome measures

57 Effectiveness was measured in quality-adjusted life-years (QALYs), which is defined  
58 as a composite measure of the duration of time spent in each of the health states  
59  
60



1  
2  
3  
4 multiplied by the utility score for each state. In this study, health utility scores were  
5 obtained from the previously published literature,<sup>20</sup> with an estimation of 0.65 in the  
6 stable state per year, 0.52 in the progression state per year and 0 in the death state (Table  
7  
8  
9  
10 1).

11 The cost-effectiveness of pembrolizumab versus methotrexate, docetaxel, or  
12 cetuximab was assessed by incremental cost-effectiveness ratio (ICER), which  
13 expressed as the incremental cost between the two treatment approaches per QALY  
14 gained. Treatments were considered “cost-effective” if the ICER was less than a  
15 willingness-to-pay threshold (WTP) of US\$28,130/QALY. The threshold of  
16 US\$28,130/QALY was three times of China's per capita GDP according to the World  
17 Health Organization recommendations for cost-effectiveness analysis.  
18  
19  
20  
21  
22  
23  
24

### 25 **Sensitivity analysis**

26 Univariate analysis was performed for model parameters subject to uncertainty. The  
27 value of parameters was varied one at a time by  $\pm 20\%$  except for discount rate ranging  
28 from 0 to 8%. A tornado analysis was used to rank-order the following parameters in  
29 order of potential impact on the outputs. The parameters included cost of  
30 pembrolizumab, cost of standard care, cost for stable state, cost for progressive state,  
31 probability from stable to progression, probability from stable to death, utility for stable  
32 and progressive state.  
33  
34  
35  
36  
37  
38  
39

40 Probabilistic sensitivity analyses (PSA) were also performed using a second-order  
41 Monte Carlo simulation to evaluate the robustness of the model to further address the  
42 uncertainty in model input parameters. Every time the model was run, all parameters  
43 were varied over their defined distribution (gamma distributions for costs, and beta  
44 distributions for values with a range between 0 and 1) simultaneously. The simulation  
45 included 1000 iterations.  
46  
47  
48  
49  
50  
51

## 52 **RESULTS**

### 53 **Base Case**

54 All the patients were dead in both arms at the termination of model simulation. Patients  
55 in the pembrolizumab group yielded 0.31 QALYs compared with 0.25 QALYs for  
56 patients in the SOC group. Total costs incurred was US\$37.787 in the pembrolizumab  
57  
58  
59  
60

1  
2  
3  
4 group and US\$32,491 in the SOC group. These results led to an ICER of US\$88,271  
5 per QALY higher than WTP, indicating that pembrolizumab is not cost-effective  
6 compared with SOC therapy.  
7  
8

### 9 **Sensitivity analyses**

10  
11 Results of univariate sensitivity analyses are depicted in the tornado diagram in Figure  
12 2. The variables with the most impact on the ICER included utility values for  
13 progressive state, cost of pembrolizumab as well as cost for cancer progression. Within  
14 the +/- 20% range of each variable, ICER remained > US\$28,130 per QALY.  
15  
16

17  
18 Finally, probabilistic sensitivity analysis over 1,000 iterations was performed to  
19 vary distributions of cost, survival and utility simultaneously. The cost-effectiveness  
20 acceptability curve is displayed in Figure 3A. It was demonstrated that standard therapy  
21 was more likely to be cost-effective compared with pembrolizumab at WTP value of  
22 US\$28,130/QALY. The scatterplot of the results of each iteration is shown in Figure  
23 3B. The majority of the points were above the WTP threshold line and falling in the  
24 first quadrant, indicating that pembrolizumab was not cost-effective versus standard  
25 care.  
26  
27

### 28 **DISCUSSION**

29  
30 To our knowledge, this is the first cost-effectiveness analysis comparing  
31 pembrolizumab with methotrexate, docetaxel, or cetuximab for treating patients with  
32 r/mHNSCC. Clinical data were derived from the KEYNOTE-040 trial, which  
33 demonstrated improved overall survival for pembrolizumab versus SOC therapy.  
34 Model results suggested that if we considered the conventional WTP threshold of  
35 US\$28,130/QALY as our cut-off, pembrolizumab was not cost-effective compared  
36 with standard therapy in r/mHNSCC, providing an ICER of US\$88,271 per QALY. A  
37 large incremental cost and a slight benefit in health outcome led to the high ICER  
38 exceeding WTP threshold. Moreover, both univariate sensitivity analysis and  
39 probabilistic sensitivity analysis demonstrated robust cost-effectiveness results to  
40 uncertainty of model input parameters.  
41  
42  
43  
44  
45  
46  
47  
48  
49  
50  
51  
52  
53  
54  
55  
56

57  
58 Similar economic assessments of pembrolizumab for the treatment of non-small  
59 cell lung cancer (NSCLC) in China consistently lead to the same conclusion. An  
60

1  
2  
3  
4 evaluation of pembrolizumab compared with chemotherapy for the treatment of PD-L1  
5 positive, NSCLC in China resulted in an ICER of US\$103,128 per QALY. However,  
6 results may be diverse in different countries or cancer types. Georgieva et al.<sup>21</sup>  
7 suggested that first-line pembrolizumab for advanced NSCLC may be cost-effective  
8 compared to platinum-doublet chemotherapy in the US but not in the UK, despite very  
9 similar ICER values in both countries. Sarfaty et al.<sup>22</sup> found that second-line  
10 pembrolizumab for advanced bladder cancer might be considered cost-effective in the  
11 US but not in the UK and Australia. The difference in cost-effectiveness and WTP  
12 thresholds between countries likely explained the difference in findings related to the  
13 cost-effectiveness of pembrolizumab.  
14  
15  
16  
17  
18  
19  
20  
21  
22

23 This analysis also had several limitations. As with most cost-effectiveness analyses,  
24 resource use in clinical trials may not represent resources for real clinical practice since  
25 clinical trials were conducted in a selected population meeting inclusion and exclusion  
26 criteria. Also, since clinical outcomes and utilities were based on previously published  
27 studies instead of prospective data, the results in this analysis may be biased.  
28 Additionally, pembrolizumab could be a cost-effective strategy for treating patients  
29 with r/mHNSCC in developed countries with WTP thresholds greater than US\$80,000.  
30 Finally, although PSA can directly reflect the influence of model uncertainty on the  
31 results, it generally assumes that the parameters are independent of each other, which  
32 may affect the credibility of the results of pharmacoeconomic evaluation. Considering  
33 that the results are still stable when the random simulations are carried out for 10,000  
34 times, we believe that are credible.  
35  
36  
37  
38  
39  
40  
41  
42  
43  
44  
45

46 Despite the above limitations, we still believe that our analysis is reasonable. The  
47 analysis was based on China Guidelines for Pharmacoeconomic Evaluations and  
48 Manual<sup>23</sup> and joint recommendations of Cost-Effectiveness in Health and Medicine.<sup>24</sup>  
49 Furthermore, extensive sensitivity analyses presented in this manuscript were  
50 performed to evaluate uncertainty on the outcomes. In conclusion, although  
51 pembrolizumab improves overall survival in patients with r/mHNSCC, this therapy is  
52 not a cost-effective strategy compared with standard therapy in China.  
53  
54  
55  
56  
57  
58  
59  
60

### Author affiliations

<sup>1</sup> Department of Pharmacy, Institute of Cancer Research and Basic Medical Sciences of Chinese Academy of Sciences, Cancer Hospital of University of Chinese Academy of Sciences, Zhejiang Cancer Hospital, Hangzhou, China

<sup>2</sup> Key Laboratory of Head and Neck Translational Research of Zhejiang Province, Institute of Cancer Research and Basic Medical Sciences of Chinese Academy of Sciences, Cancer Hospital of University of Chinese Academy of Sciences, Zhejiang Cancer Hospital, Hangzhou, China

**Contributors** Study conception and design: WX, HD and PH; Acquisition of data: XZ, YT and GX; Analysis and interpretation of data: WX and HD; Drafting of manuscript: WX and QF; All authors revised the first draft and agreed with the final version.

**Funding** This research was supported by Natural Science Foundation of Zhejiang Province (LQ18H160018) and Natural Science Foundation of China (81903898).

**Competing interests** None declared.

**Patient consent** Not required

**Provenance and peer review** Not commissioned; externally peer reviewed.

**Data sharing statement** No additional data available.

### REFERENCES

1. Ferlay J, Soerjomataram I, Dikshit R, et al. Cancer incidence and mortality worldwide: sources, methods and major patterns in GLOBOCAN 2012. *Int J Cancer* 2015;136:E359-86. doi: 10.1002/ijc.29210 [published Online First: 2014/09/16]
2. Fitzmaurice C, Allen C, Barber RM, et al. Global, Regional, and National Cancer Incidence, Mortality, Years of Life Lost, Years Lived With Disability, and Disability-Adjusted Life-years for 32 Cancer Groups, 1990 to 2015: A Systematic Analysis for the Global Burden of Disease Study. *JAMA Oncol* 2017;3:524-48. doi: 10.1001/jamaoncol.2016.5688 [published Online First: 2016/12/06]

- 1  
2  
3  
4 3. Beitler JJ, Zhang Q, Fu KK, et al. Final results of local-regional control and late toxicity  
5  
6 of RTOG 9003: a randomized trial of altered fractionation radiation for locally advanced  
7  
8 head and neck cancer. *Int J Radiat Oncol Biol Phys* 2014;89:13-20. doi:  
9  
10 10.1016/j.ijrobp.2013.12.027 [published Online First: 2014/03/13]  
11  
12
- 13  
14 4. Ang KK, Zhang Q, Rosenthal DI, et al. Randomized phase III trial of concurrent  
15  
16 accelerated radiation plus cisplatin with or without cetuximab for stage III to IV head  
17  
18 and neck carcinoma: RTOG 0522. *J Clin Oncol* 2014;32:2940-50. doi:  
19  
20 10.1200/jco.2013.53.5633 [published Online First: 2014/08/27]  
21  
22
- 23  
24 5. Vermorken JB, Specenier P. Optimal treatment for recurrent/metastatic head and neck  
25  
26 cancer. *Ann Oncol* 2010;21 Suppl 7:vii252-61. doi: 10.1093/annonc/mdq453 [published  
27  
28 Online First: 2010/10/15]  
29  
30
- 31  
32 6. Stewart JS, Cohen EE, Licitra L, et al. Phase III study of gefitinib compared with  
33  
34 intravenous methotrexate for recurrent squamous cell carcinoma of the head and neck  
35  
36 [corrected]. *J Clin Oncol* 2009;27:1864-71. doi: 10.1200/jco.2008.17.0530 [published  
37  
38 Online First: 2009/03/18]  
39  
40
- 41  
42 7. Argiris A, Ghebremichael M, Gilbert J, et al. Phase III randomized, placebo-controlled  
43  
44 trial of docetaxel with or without gefitinib in recurrent or metastatic head and neck  
45  
46 cancer: an eastern cooperative oncology group trial. *J Clin Oncol* 2013;31:1405-14.  
47  
48 doi: 10.1200/jco.2012.45.4272 [published Online First: 2013/03/06]  
49  
50
- 51  
52 8. Soulieres D, Faivre S, Mesia R, et al. Buparlisib and paclitaxel in patients with platinum-  
53  
54 pretreated recurrent or metastatic squamous cell carcinoma of the head and neck  
55  
56 (BERIL-1): a randomised, double-blind, placebo-controlled phase 2 trial. *Lancet Oncol*  
57  
58  
59  
60

- 1  
2  
3  
4 2017;18:323-35. doi: 10.1016/s1470-2045(17)30064-5 [published Online First:  
5  
6 2017/01/31]  
7  
8  
9 9. Vermorken JB, Trigo J, Hitt R, et al. Open-label, uncontrolled, multicenter phase II  
10  
11 study to evaluate the efficacy and toxicity of cetuximab as a single agent in patients  
12  
13 with recurrent and/or metastatic squamous cell carcinoma of the head and neck who  
14  
15 failed to respond to platinum-based therapy. *J Clin Oncol* 2007;25:2171-7. doi:  
16  
17 10.1200/jco.2006.06.7447 [published Online First: 2007/06/01]  
18  
19  
20 10. Motzer RJ, Tannir NM, McDermott DF, et al. Nivolumab plus Ipilimumab versus  
21  
22 Sunitinib in Advanced Renal-Cell Carcinoma. *N Engl J Med* 2018;378:1277-90. doi:  
23  
24 10.1056/NEJMoa1712126 [published Online First: 2018/03/22]  
25  
26  
27 11. Vaughn DJ, Bellmunt J, Fradet Y, et al. Health-Related Quality-of-Life Analysis From  
28  
29 KEYNOTE-045: A Phase III Study of Pembrolizumab Versus Chemotherapy for  
30  
31 Previously Treated Advanced Urothelial Cancer. *J Clin Oncol* 2018;36:1579-87. doi:  
32  
33 10.1200/jco.2017.76.9562 [published Online First: 2018/03/29]  
34  
35  
36 12. Carlino MS, Long GV, Schadendorf D, et al. Outcomes by line of therapy and  
37  
38 programmed death ligand 1 expression in patients with advanced melanoma treated  
39  
40 with pembrolizumab or ipilimumab in KEYNOTE-006: A randomised clinical trial. *Eur J*  
41  
42 *Cancer* 2018;101:236-43. doi: 10.1016/j.ejca.2018.06.034 [published Online First:  
43  
44 2018/08/11]  
45  
46  
47 13. Mok TSK, Wu YL, Kudaba I, et al. Pembrolizumab versus chemotherapy for previously  
48  
49 untreated, PD-L1-expressing, locally advanced or metastatic non-small-cell lung  
50  
51 cancer (KEYNOTE-042): a randomised, open-label, controlled, phase 3 trial. *Lancet*  
52  
53  
54  
55  
56  
57  
58  
59  
60

- 1  
2  
3  
4 2019;393:1819-30. doi: 10.1016/s0140-6736(18)32409-7 [published Online First:  
5  
6 2019/04/09]  
7  
8  
9 14. Cohen EEW, Soulieres D, Le Tourneau C, et al. Pembrolizumab versus methotrexate,  
10 docetaxel, or cetuximab for recurrent or metastatic head-and-neck squamous cell  
11 carcinoma (KEYNOTE-040): a randomised, open-label, phase 3 study. *Lancet*  
12 2019;393:156-67. doi: 10.1016/s0140-6736(18)31999-8 [published Online First:  
13  
14 2018/12/05]  
15  
16  
17 15. A L-C, D F, JA D, et al. Fulvestrant 500 mg Versus Anastrozole 1 mg for the First-Line  
18 Treatment of Advanced Breast Cancer: Overall Survival Analysis From the Phase II  
19 FIRST Study. *J Clin Oncol* 2015;33:3781-7.  
20  
21  
22 16. JR B. Markov models in medical decision making: a practical guide. *Med decis making*  
23 1993;13:322-38.  
24  
25  
26 17. TJ H, L H, BJ M, et al. Bevacizumab in treatment of high-risk ovarian cancer--a cost-  
27 effectiveness analysis. *The oncologist* 2014;19:523-7.  
28  
29  
30 18. Wu B, Dong B, Xu Y, et al. Economic evaluation of first-line treatments for metastatic  
31 renal cell carcinoma: a cost-effectiveness analysis in a health resource-limited setting.  
32 *PLoS One* 2012;7:e32530. doi: 10.1371/journal.pone.0032530 [published Online First:  
33  
34 2012/03/14]  
35  
36  
37 19. Wu B, Ye M, Chen H, et al. Costs of trastuzumab in combination with chemotherapy  
38 for HER2-positive advanced gastric or gastroesophageal junction cancer: an economic  
39 evaluation in the Chinese context. *Clin Ther* 2012;34:468-79. doi:  
40 10.1016/j.clinthera.2012.01.012 [published Online First: 2012/02/14]  
41  
42  
43  
44  
45  
46  
47  
48  
49  
50  
51  
52  
53  
54  
55  
56  
57  
58  
59  
60

- 1  
2  
3  
4 20. Hannouf MB, Sehgal C, Cao JQ, et al. Cost-effectiveness of adding cetuximab to  
5  
6 platinum-based chemotherapy for first-line treatment of recurrent or metastatic head  
7  
8 and neck cancer. *PLoS One* 2012;7:e38557. doi: 10.1371/journal.pone.0038557  
9  
10 [published Online First: 2012/06/30]  
11  
12  
13  
14 21. Georgieva M, da Silveira Nogueira Lima JP, Aguiar P, Jr., et al. Cost-effectiveness of  
15  
16 pembrolizumab as first-line therapy for advanced non-small cell lung cancer. *Lung*  
17  
18 *Cancer* 2018;124:248-54. doi: 10.1016/j.lungcan.2018.08.018 [published Online First:  
19  
20 2018/10/01]  
21  
22  
23  
24 22. Sarfaty M, Hall PS, Chan KKW, et al. Cost-effectiveness of Pembrolizumab in Second-  
25  
26 line Advanced Bladder Cancer. *Eur Urol* 2018;74:57-62. doi:  
27  
28 10.1016/j.eururo.2018.03.006 [published Online First: 2018/03/27]  
29  
30  
31  
32 23. GE Liu SH, JH Wu, J Wu, L Yang, HC Li. China guidelines for pharmacoeconomic  
33  
34 evaluations and manual. *Beijing: Science Press* 2015  
35  
36  
37  
38 24. S. Shepard D. Cost-effectiveness in Health and Medicine. By M.R. Gold, J.E Siegel,  
39  
40 L.B. Russell, and M.C. Weinstein (eds). New York: Oxford University Press, 19961999.  
41  
42  
43  
44

## 45 TABLES

46 **Table 1** Parameters for cost-effectiveness model

| 47 Variable                        | 48 Value | 49 Range |        | 50 Distribution | 51 Source |
|------------------------------------|----------|----------|--------|-----------------|-----------|
|                                    |          | 52 Min   | 53 Max |                 |           |
| 54 <b>Transition probabilities</b> |          |          |        |                 |           |
| 55 <b>Pembrolizumab</b>            |          |          |        |                 |           |
| 56 Progression from stable state   | 0.281    | 0.225    | 0.337  | Beta            | [14]      |
| 57 Death from stable state         | 0.079    | 0.063    | 0.095  | Beta            | [14]      |
| 58 Mortality after progression     | 0.104    | 0.083    | 0.125  | Beta            | [14]      |
| 59 <b>Standard chemotherapy</b>    |          |          |        |                 |           |



|                               |       |       |       |       |            |
|-------------------------------|-------|-------|-------|-------|------------|
| Progression from stable state | 0.260 | 0.208 | 0.312 | Beta  | [14]       |
| Death from stable state       | 0.096 | 0.076 | 0.115 | Beta  | [14]       |
| Mortality after progression   | 0.140 | 0.112 | 0.168 | Beta  | [14]       |
| <b>Utilities</b>              |       |       |       |       |            |
| Stable state                  | 0.650 | 0.500 | 1.000 | Beta  | [21]       |
| Progressive state             | 0.520 | 0.200 | 0.700 | Beta  | [21]       |
| <b>Cost</b>                   |       |       |       |       |            |
| Pembrolizumab                 | 5421  | 4337  | 6506  | Gamma | Calculated |
| Standard first                | 1439  | 1151  | 1727  | Gamma | Calculated |
| Standard                      | 1253  | 1002  | 1503  | Gamma | Calculated |
| Administration                | 13    | 10    | 15    | Gamma | Calculated |
| Test                          | 154   | 123   | 185   | Gamma | Calculated |
| Time Cost                     | 32    | 26    | 39    | Gamma | Calculated |
| <b>Severe Adverse Events</b>  |       |       |       |       |            |
| Pembrolizumab                 | 1227  | 981   | 1472  | Gamma | Calculated |
| Standard                      | 5855  | 4684  | 7027  | Gamma | Calculated |
| Cancer progression            | 2555  | 1677  | 3620  | Gamma | [18]       |

## FIGURE LEGENDS

**Figure 1** Model structure. (A) Abbreviated decision tree and Markov model; (B) Model states and transitions.

**Figure 2** Tornado plot of the univariate sensitivity analyses for pembrolizumab vs. standard of care therapy.

**Figure 3** Probabilistic sensitivity analyses for pembrolizumab vs. SOC therapy. (A) Cost-effectiveness acceptability curve; (B) cost-effectiveness plane. WTP: willingness to pay; SOC: standard of care.

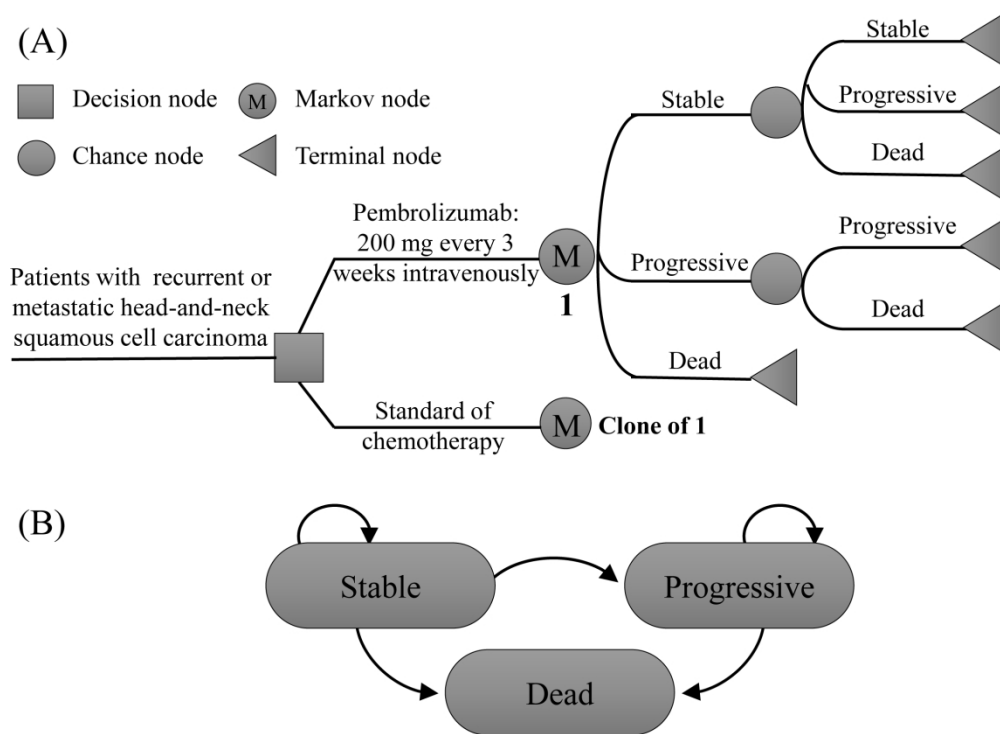

Figure 1 Model structure. (A) Abbreviated decision tree and Markov model; (B) Model states and transitions.

1  
2  
3  
4  
5  
6  
7  
8  
9  
10  
11  
12  
13  
14  
15  
16  
17  
18  
19  
20  
21  
22  
23  
24  
25  
26  
27  
28  
29  
30  
31  
32  
33  
34  
35  
36  
37  
38  
39  
40  
41  
42  
43  
44  
45  
46  
47  
48  
49  
50  
51  
52  
53  
54  
55  
56  
57  
58  
59  
60

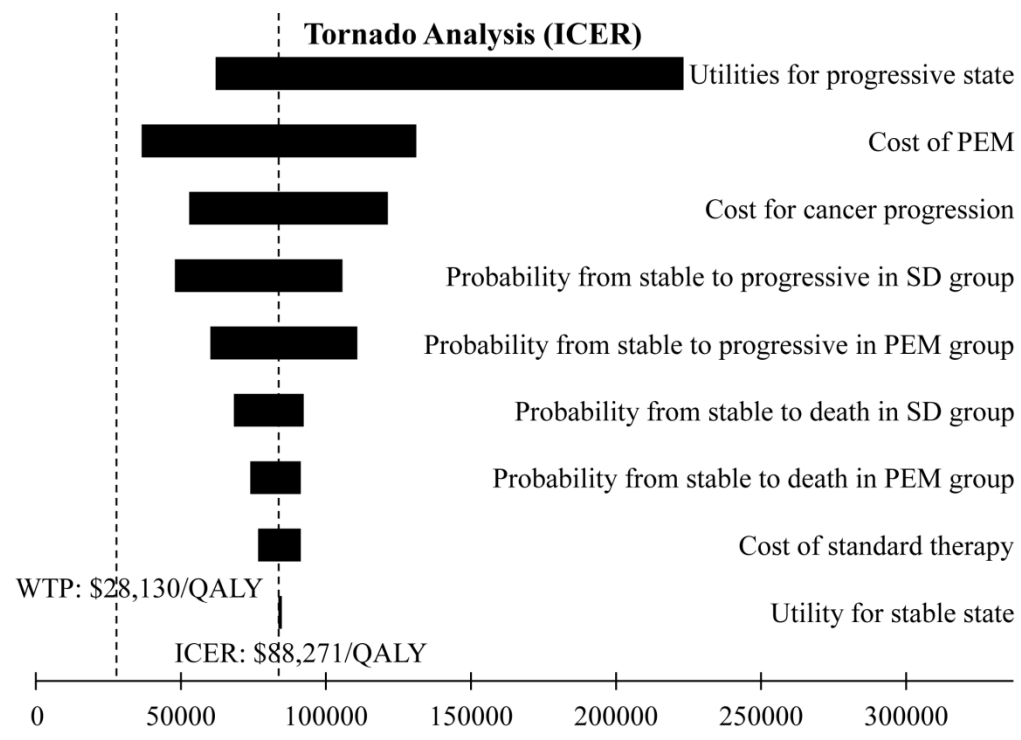

Figure 2 Tornado plot of the univariate sensitivity analyses for pembrolizumab vs. standard of care therapy.

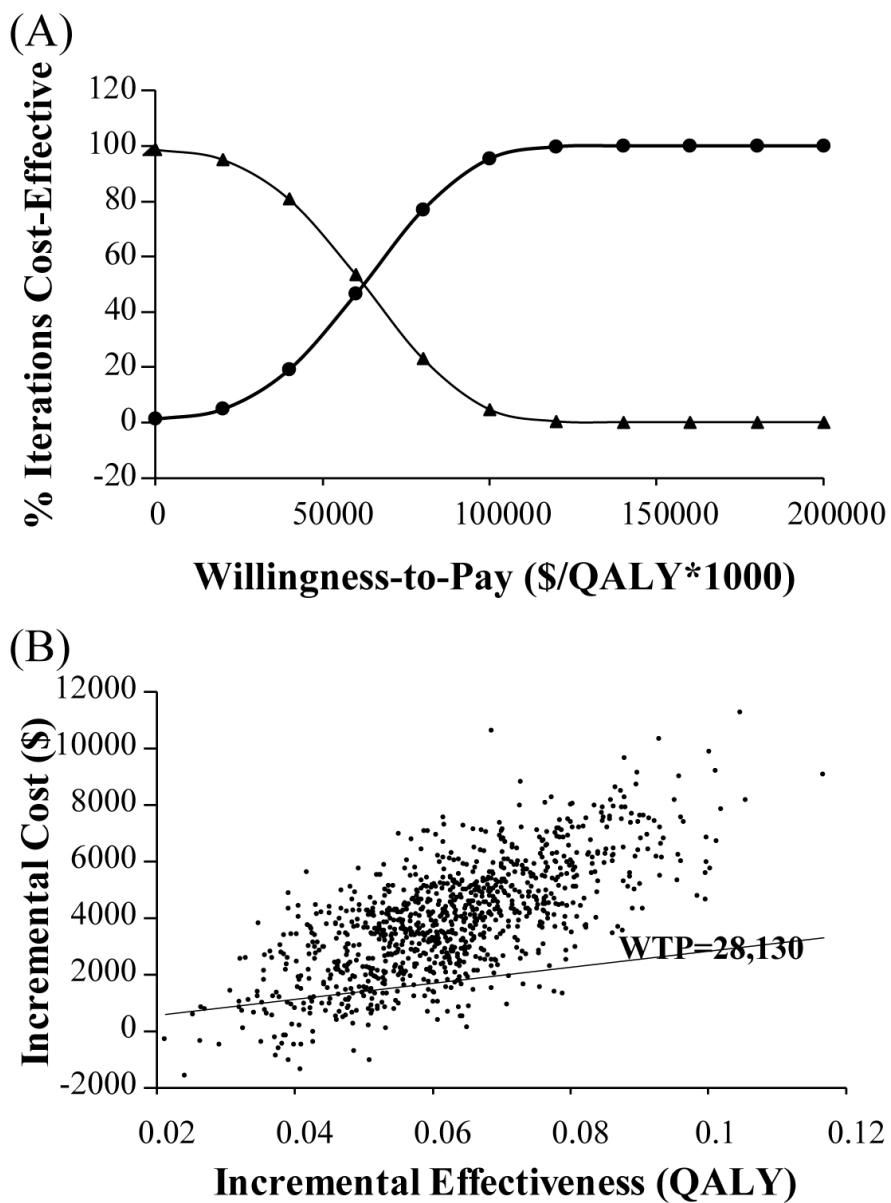

Figure 3 Probabilistic sensitivity analyses for pembrolizumab vs. SOC therapy. (A) Cost-effectiveness acceptability curve; (B) cost-effectiveness plane. WTP: willingness to pay; SOC: standard of care.

# BMJ Open

## Cost-Effectiveness of pembrolizumab for treatment of platinum-resistant recurrent or metastatic head-and-neck squamous cell carcinoma in China: an economic analysis based on a randomised, open label, phase III Trial

|                                 |                                                                                                                                                                                                                                                                                                                                                                                                                                                                           |
|---------------------------------|---------------------------------------------------------------------------------------------------------------------------------------------------------------------------------------------------------------------------------------------------------------------------------------------------------------------------------------------------------------------------------------------------------------------------------------------------------------------------|
| Journal:                        | <i>BMJ Open</i>                                                                                                                                                                                                                                                                                                                                                                                                                                                           |
| Manuscript ID                   | bmjopen-2020-038867.R1                                                                                                                                                                                                                                                                                                                                                                                                                                                    |
| Article Type:                   | Original research                                                                                                                                                                                                                                                                                                                                                                                                                                                         |
| Date Submitted by the Author:   | 03-Aug-2020                                                                                                                                                                                                                                                                                                                                                                                                                                                               |
| Complete List of Authors:       | Xin, Wenxiu; Zhejiang Cancer Hospital, Department of Pharmacy<br>Ding, Haiying; Zhejiang Cancer Hospital, Department of Pharmacy<br>Fang, Qilu; Zhejiang Cancer Hospital, Department of Pharmacy<br>Zheng, Xiaowei; Zhejiang Cancer Hospital, Department of pharmacy<br>Tong, Yinghui; Zhejiang Cancer Hospital, Department of Pharmacy<br>Xu, Gaoqi; Zhejiang Cancer Hospital, Department of Pharmacy<br>Yang, Guonong; Zhejiang Cancer Hospital, Department of Pharmacy |
| <b>Primary Subject Heading</b>: | Health economics                                                                                                                                                                                                                                                                                                                                                                                                                                                          |
| Secondary Subject Heading:      | Oncology, Health economics                                                                                                                                                                                                                                                                                                                                                                                                                                                |
| Keywords:                       | CLINICAL PHARMACOLOGY, HEALTH ECONOMICS, Head & neck tumours < ONCOLOGY                                                                                                                                                                                                                                                                                                                                                                                                   |
|                                 |                                                                                                                                                                                                                                                                                                                                                                                                                                                                           |

SCHOLARONE™  
Manuscripts



I, the Submitting Author has the right to grant and does grant on behalf of all authors of the Work (as defined in the below author licence), an exclusive licence and/or a non-exclusive licence for contributions from authors who are: i) UK Crown employees; ii) where BMJ has agreed a CC-BY licence shall apply, and/or iii) in accordance with the terms applicable for US Federal Government officers or employees acting as part of their official duties; on a worldwide, perpetual, irrevocable, royalty-free basis to BMJ Publishing Group Ltd ("BMJ") its licensees and where the relevant Journal is co-owned by BMJ to the co-owners of the Journal, to publish the Work in this journal and any other BMJ products and to exploit all rights, as set out in our [licence](#).

The Submitting Author accepts and understands that any supply made under these terms is made by BMJ to the Submitting Author unless you are acting as an employee on behalf of your employer or a postgraduate student of an affiliated institution which is paying any applicable article publishing charge ("APC") for Open Access articles. Where the Submitting Author wishes to make the Work available on an Open Access basis (and intends to pay the relevant APC), the terms of reuse of such Open Access shall be governed by a Creative Commons licence – details of these licences and which [Creative Commons](#) licence will apply to this Work are set out in our licence referred to above.

Other than as permitted in any relevant BMJ Author's Self Archiving Policies, I confirm this Work has not been accepted for publication elsewhere, is not being considered for publication elsewhere and does not duplicate material already published. I confirm all authors consent to publication of this Work and authorise the granting of this licence.

1  
2  
3  
4 1 **Cost-Effectiveness of pembrolizumab for treatment of platinum-resistant**  
5 **recurrent or metastatic head-and-neck squamous cell carcinoma in China: an**  
6 **economic analysis based on a randomised, open label, phase III Trial**  
7  
8  
9  
10 4

11 5 Wenxiu Xin,<sup>1,2,3,#,\*</sup> Haiying Ding,<sup>1,2,#</sup> Qilu Fang,<sup>1,2</sup> Xiaowei Zheng,<sup>1,2</sup> Yinghui Tong,<sup>1,2</sup>  
12 6 Gaoqi Xu,<sup>1,2</sup> Guonong Yang<sup>1,2,\*</sup>  
13  
14  
15  
16  
17

18 1 Department of Pharmacy, Cancer Hospital of the University of Chinese Academy of  
19 9 Sciences (Zhejiang Cancer Hospital), Hangzhou, China

20 2 Institute of Cancer and Basic Medicine ( IBMC ) , Chinese Academy of Sciences,  
21 10 Hangzhou, China  
22  
23  
24

25 3 Key Laboratory of Head and Neck Translational Research of Zhejiang Province,  
26 12 Hangzhou, China  
27  
28  
29  
30  
31

32 15 #These authors contributed equally to this work  
33  
34  
35

36 17 \*Corresponding author:

37 18 Wenxiu Xin

38  
39 19 Department of Pharmacy, Cancer Hospital of the University of Chinese Academy of  
40 20 Sciences (Zhejiang Cancer Hospital), No.1 Banshan Road, Hangzhou 310022, China.

41 21 Tel: +86 8812 2438 Email: xinwx@zjcc.org.cn  
42  
43  
44  
45  
46  
47

48 23 Guonong Yang

49 24 Department of Pharmacy, Cancer Hospital of the University of Chinese Academy of  
50 25 Sciences (Zhejiang Cancer Hospital), No.1 Banshan Road, Hangzhou 310022, China.

51 26 Tel: +86 8812 2438 Email: yanggn@zjcc.org.cn  
52  
53  
54  
55  
56

57 28 Word count: 2408  
58  
59  
60

## 1 ABSTRACT

2 **Background:** Pembrolizumab was recently demonstrated to have a survival benefit for  
3 patients with recurrent or metastatic head-and-neck squamous cell carcinoma  
4 (r/mHNSCC). However, the cost-effectiveness of pembrolizumab versus chemotherapy  
5 in China remained uncertain.

6 **Objectives:** This analysis aimed to describe the cost-effectiveness of pembrolizumab  
7 versus standard-of-care (SOC) therapy in r/mHNSCC in China.

8 **Design:** A Markov model consisting of three health states (stable, progressive and dead)  
9 was developed to compare the costs and effectiveness of pembrolizumab with SOC in  
10 platinum-resistant r/mHNSCC. Model inputs for transition probabilities and toxicity  
11 were collected from the KEYNOTE-040 trial, while health utilities were estimated from  
12 a literature review. The cost data were acquired for the payer's perspective of China.  
13 Costs and outcomes were discounted at an annual rate of 3.0%. Sensitivity analyses  
14 were conducted to test the uncertainties surrounding model parameters.

15 **Outcome measures:** The primary outcome was incremental cost-effectiveness ratios  
16 (ICERs), which were calculated as cost per quality-adjusted life years (QALYs).

17 **Results:** The total mean cost of pembrolizumab versus standard-of-care was  
18 US\$45,861 and US\$41,950, respectively. As for effectiveness, pembrolizumab yielded  
19 0.31 QALYs compared with 0.25 QALYs for SOC therapy. The ICER for  
20 pembrolizumab versus SOC was US\$65,186/QALY, which was higher than  
21 willingness-to-pay threshold (WTP) of US\$28,130/QALY in China. The univariate  
22 sensitivity analysis indicated that utility values for progressive state, probability from  
23 stable to progressive in SD group as well as cost of pembrolizumab were the three most  
24 influential variables on ICER. The probabilistic sensitivity analyses demonstrated that  
25 standard therapy was more likely to be cost-effective compared with pembrolizumab at  
26 WTP value of US\$28,130/QALY. Results were robust across both univariate analysis  
27 and probabilistic sensitivity analyses.

28 **Conclusions:** Pembrolizumab is not likely to be a cost-effective strategy compared  
29 with SOC therapy for platinum-resistant r/mHNSCC patients in China.



1

## 2 **Strengths and limitations of this study**

3 1. Pembrolizumab was recently approved to have a survival benefit for patients with  
4 recurrent or metastatic head-and-neck squamous cell carcinoma (r/mHNSCC).  
5 However, the cost-effectiveness of pembrolizumab in treating r/mHNSCC was still  
6 unknown.

7 2. To our knowledge, this is the first cost-effectiveness analysis comparing  
8 pembrolizumab with methotrexate, docetaxel, or cetuximab for treating patients with  
9 r/mHNSCC.

10 3. The main limitations of the study are that resource use in clinical trials may not  
11 represent resources for real clinical practice since clinical trials were conducted in a  
12 selected population meeting inclusion and exclusion criteria.

13

### 14 ***SUBHEADING: Pembrolizumab cost-effectiveness for Head-and-Neck Squamous*** 15 ***Cell Carcinoma***

16

## 17 **INTRODUCTION**

18 Head and neck squamous cell carcinoma (HNSCC) represents a major global cause of  
19 cancer-associated morbidity and death with a worldwide incidence of 550,000 cases  
20 and 380,000 deaths per year.<sup>1 2</sup> After definitive treatment, approximately 30-40% of  
21 patients with HNSCC will progress<sup>3 4</sup> and about 50-60% will have recurrent disease.<sup>5</sup>  
22 Platinum-based systemic chemotherapy regimens are commonly used in the first-line  
23 treatment for patients with recurrent or metastatic HNSCC (r/mHNSCC). For patients  
24 with failure of first-line platinum therapy, the commonly used drug is methotrexate.<sup>6</sup>  
25 The second-line of paclitaxel or docetaxel has a certain salvage effect if the first-line  
26 therapy does not receive the taxane.<sup>7 8</sup> Cetuximab is also suitable for patients who have  
27 not been exposed to this drug or have a poor PS score.<sup>9</sup>

28 Checkpoint inhibitors of the programmed cell death protein 1 (PD-1) have shown  
29 impressive effects on a number of cancers.<sup>10-13</sup> In recent years, anti-PD-1 drugs have

1 developed rapidly in advanced HNSCC. The Food and Drug Administration (FDA) of  
2 the US continuously approved the indications of pembrolizumab and nivolumab for the  
3 treatment of recurrent or metastatic HNSCC. Indications of pembrolizumab approved  
4 by China Food and Drug Administration (CFDA) include melanoma, non-small cell  
5 lung cancer and esophageal cancer. Besides, because of the excellent tumor treatment  
6 effect, pembrolizumab is also widely used in HNSCC, small cell lung cancer, classical  
7 Hodgkin lymphoma, primary mediastinal large B-cell lymphoma, urothelial carcinoma,  
8 gastric cancer, cervical cancer, colorectal cancer and many other cancer types according  
9 to the recommendations of indications approved by FDA and several guidelines such  
10 as NCCN (National Comprehensive Cancer Network) and CSCO (Chinese Society of  
11 Clinical Oncology).

12 The recently reported KEYNOTE-040<sup>14</sup> study found a survival benefit for patients  
13 with platinum-resistant recurrent or metastatic disease who received pembrolizumab.  
14 In this clinical trial, patients were randomly assigned to receive pembrolizumab or  
15 standard-of-care (SOC) (docetaxel, methotrexate, or cetuximab). The study showed that  
16 median overall survival was 8.4 months (95% CI: 6.4-9.4) in the pembrolizumab group  
17 and 6.9 months (95% CI: 5.9-8.0) in SOC group. Thus, pembrolizumab extended the  
18 median overall survival by 1.5 months. Also, patients in pembrolizumab group had a  
19 favorable safety profile compared with patients in SOC group. Although there is a  
20 significant improvement in the treatment of patients with r/mHNSCC, the prognosis  
21 remains relatively poor and the economic value of pembrolizumab in this population  
22 remains unknown. The objective of this study was to evaluate the cost-effectiveness of  
23 pembrolizumab compared with standard treatment, in order to find the more cost-  
24 effective therapy in the treatment of r/mHNSCC in China.

## 25 **METHODS**

### 26 **Trial Background**

27 The target patients in the model were in line with the eligibility criteria for the  
28 randomised, open-label, phase 3 clinical trial (KEYNOTE-040). This included HNSCC  
29 patients that progressed during or after platinum-containing therapy for recurrent and/or

1 metastatic disease. Patients that recurred or progressed within 3-6 months of platinum-  
2 containing therapy for locally advanced disease were also included. Patients were  
3 randomly assigned to receive either pembrolizumab or investigator's choice of SOC  
4 therapy. The same treatment mixes as in the SOC arm (26.2% methotrexate, 44.4%  
5 docetaxel, 29.4% cetuximab) was assumed in our model without adoptions, as it  
6 represents the standard of care. Patients assigned to pembrolizumab arm received 200  
7 mg every 3 weeks intravenously. In the SOC arm, patients received 40 mg/m<sup>2</sup> body  
8 surface area of methotrexate per week intravenously (could be increased to 60 mg/m<sup>2</sup>  
9 in the absence of toxicity), 75 mg/m<sup>2</sup> of docetaxel every 3 weeks intravenously, or 250  
10 mg/m<sup>2</sup> of cetuximab per week intravenously following a loading dose of 400 mg/m<sup>2</sup>.  
11 Treatment continued until progression was confirmed on a scan obtained at least 4  
12 weeks later or other criteria requiring discontinuation were met.

### 13 **Patients and Public Involvement**

14 There was patient representation on the KEYNOTE-040 trial. However, no patients or  
15 public was involvement in this cost-effectiveness analysis.

### 16 **Model Structure**

17 We compared the cost-effectiveness of pembrolizumab with methotrexate, docetaxel,  
18 or cetuximab for patients with platinum-resistant r/mHNSCC. We conducted a Markov  
19 model by TreeAge pro Suite (TreeAge Software Inc, Williamstown, MA, USA) to  
20 simulate treatments, adverse events, costs, survival, and quality of life among simulated  
21 patients (Figure 1). The abbreviated decision tree and Markov model were presented in  
22 Figure 1A. Three mutually exclusive health states, progression-free (stable state),  
23 progressive disease (cancer progression) and death, were included in the state transition  
24 diagram (Figure 1B). Patients started receiving pembrolizumab or standard  
25 chemotherapy in the stable state, and could stay in or move to progressive disease or  
26 death at a cycle length due to their assigned transition probabilities. The simulation was  
27 conducted in three-week cycles for a period of 30 years during which all patients were  
28 expected to die. Transition probabilities of every state were calculated based on the  
29 following equation:  $P(1\text{ month}) = 1 - 0.5^{(1/\text{median time to event})}$ . The equation was derived

1 from  $P = 1 - e^{-R}$  and  $R = -\ln(0.5)/(\text{time to event}/\text{number of treatment cycles})$ .<sup>15-17</sup> The  
2 modeled overall survival curve was presented in Supplementary Figure 1A. The  
3 survival curve extracted using Engauge Digitizer software (version 4.1;  
4 <http://digitizer.sourceforge.net>) from clinical trials was shown in Supplementary Figure  
5 1B.

## 6 **Cost**

7 Since the therapeutic drugs were administered weekly or every three weeks in the  
8 KEYNOTE-040 trial, the cycle length of our model was three weeks. Therefore, all the  
9 costs we provided were for every three weeks. All aspects of direct medical costs for  
10 treating the disease, including the cost for pembrolizumab or standard therapy, imaging  
11 and laboratory tests, hospitalization, administration for stable state and the cost for  
12 subsequent therapy in disease progressive, were taken into account. Since patients  
13 randomised to the SOC arm received one of three chemotherapy regimens, the drug  
14 acquisition cost was calculated as a weighted average cost based on the patients'  
15 number of each regimen in KEYNOTE-040. In addition, time cost was estimated at  
16 US\$35.73 per day on the basis of the average monthly salary in China in 2018<sup>18</sup>.  
17 Supportive care cost and terminal cancer cost were also included and extracted from  
18 published articles<sup>19 20</sup>. The incidence of adverse events comes from clinical trials  
19 KEYNOTE-040. Costs due to severe (grade 3-4) treatment-related adverse events were  
20 either derived from the literature<sup>21 22</sup> or calculated from the payer's perspective of China.  
21 Costs for grade 1-2 adverse events were deemed to be negligible. All costs in the model  
22 were adjusted to US dollars based on the 2018 average exchange rate (US\$ 1 = CNY  
23 6.6174)<sup>23</sup> and discounted at a rate of 3% annually (Table 1).

## 24 **Utilities and outcome measures**

25 Effectiveness was measured in quality-adjusted life-years (QALYs), which equals the  
26 survival time of the patient in a certain health state multiplied by the health utility value  
27 (quality of life weight) during that period. In this study, health utility scores were  
28 obtained from the previously published literature,<sup>24</sup> with an estimation of 0.65 in the  
29 stable state per year, 0.52 in the progression state per year and 0 in the death state (Table

1 1).

2 The cost-effectiveness of pembrolizumab versus methotrexate, docetaxel, or  
3 cetuximab was assessed by incremental cost-effectiveness ratio (ICER), which  
4 expressed as the incremental cost between the two treatment approaches per QALY  
5 gained. Treatments were considered “cost-effective” if the ICER was less than a  
6 willingness-to-pay threshold (WTP) of US\$28,130/QALY. The threshold of  
7 US\$28,130/QALY was three times of China's per capita GDP according to the World  
8 Health Organization recommendations for cost-effectiveness analysis.

### 9 **Sensitivity analysis**

10 Univariate analysis was performed for model parameters subject to uncertainty. The  
11 value of parameters was varied one at a time by  $\pm 20\%$  except for discount rate ranging  
12 from 0 to 8%. A tornado analysis was used to rank-order the following parameters in  
13 order of potential impact on the outputs. The parameters included cost of  
14 pembrolizumab, cost of standard care, cost for stable state, cost for progressive state,  
15 probability from stable to progression, probability from stable to death, utility for stable  
16 and progressive state.

17 In order to evaluate the robustness of the model to further address the uncertainty  
18 in model input parameters, probabilistic sensitivity analyses (PSA) were performed  
19 using a second-order Monte Carlo simulation. Every time the model was run, all  
20 parameters were varied over their defined distribution (gamma distributions for costs,  
21 and beta distributions for values with a range between 0 and 1) simultaneously. The  
22 simulation included 1,000 iterations.

## 23 **RESULTS**

### 24 **Base Case**

25 All the patients were dead in both arms at the termination of model simulation. Patients  
26 in the pembrolizumab group yielded 0.31 QALYs compared with 0.25 QALYs for  
27 patients in the SOC group. Total costs incurred was US\$45,861 in the pembrolizumab  
28 group and US\$41,950 in the SOC group. These results led to an ICER of US\$65,186  
29 per QALY higher than WTP, indicating that pembrolizumab is not cost-effective

1  
2  
3  
4 compared with SOC therapy.

## 5 2 **Sensitivity analyses**

6  
7 Results of univariate sensitivity analyses are depicted in the tornado diagram in Figure  
8  
9 2. The variables with the most impact on the ICER included utility values for  
10  
11 progressive state, probability from stable to progressive in SD group as well as cost of  
12  
13 pembrolizumab. Within the +/- 20% range of each variable, ICER remained >  
14  
15 US\$28,130 per QALY.  
16

17  
18 Finally, probabilistic sensitivity analysis over 1,000 iterations was performed to  
19  
20 vary distributions of cost, survival and utility simultaneously. The cost-effectiveness  
21  
22 acceptability curve is displayed in Figure 3A. It was demonstrated that standard therapy  
23  
24 was more likely to be cost-effective compared with pembrolizumab at WTP value of  
25  
26 US\$28,130/QALY. The scatterplot of the results of each iteration is shown in Figure  
27  
28 3B. The majority of the points were above the WTP threshold line and falling in the  
29  
30 first quadrant, indicating that pembrolizumab was not cost-effective versus standard  
31  
32 care.  
33

## 34 16 **DISCUSSION**

35  
36 To our knowledge, this is the first cost-effectiveness analysis comparing  
37  
38 pembrolizumab with methotrexate, docetaxel, or cetuximab for treating patients with  
39  
40 r/mHNSCC. Clinical data were derived from the KEYNOTE-040 trial, which  
41  
42 demonstrated improved overall survival for pembrolizumab versus SOC therapy.  
43  
44 Model results suggested that if we considered the conventional WTP threshold of  
45  
46 US\$28,130/QALY as our cut-off, pembrolizumab was not cost-effective compared  
47  
48 with standard therapy in r/mHNSCC, providing an ICER of US\$65,186 per QALY. A  
49  
50 large incremental cost and a slight benefit in health outcome led to the high ICER  
51  
52 exceeding WTP threshold. Moreover, both univariate sensitivity analysis and  
53  
54 probabilistic sensitivity analysis demonstrated robust cost-effectiveness results to  
55  
56 uncertainty of model input parameters.  
57

58  
59 Similar economic assessments of pembrolizumab for the treatment of non-small  
60  
cell lung cancer (NSCLC) in China consistently lead to the same conclusion<sup>25</sup>. An

1 evaluation of pembrolizumab compared with chemotherapy for the treatment of PD-L1  
2 positive, NSCLC in China resulted in an ICER of US\$103,128 per QALY. However,  
3 results may be diverse in different countries or cancer types. Georgieva et al.<sup>26</sup>  
4 suggested that first-line pembrolizumab for advanced NSCLC may be cost-effective  
5 compared to platinum-doublet chemotherapy in the US but not in the UK, despite very  
6 similar ICER values in both countries. Sarfaty et al.<sup>27</sup> found that second-line  
7 pembrolizumab for advanced bladder cancer might be considered cost-effective in the  
8 US but not in the UK and Australia. The difference in cost-effectiveness and WTP  
9 thresholds between countries likely explained the difference in findings related to the  
10 cost-effectiveness of pembrolizumab.

11 This analysis also had several limitations. Like most cost-effectiveness analyses,  
12 resources used in clinical trials might not represent resources for actual clinical practice  
13 since clinical trials were conducted in a selected population that meeting inclusion and  
14 exclusion criteria. Also, since clinical outcomes and utilities were based on previously  
15 published studies instead of prospective data, the results in this analysis may be biased.  
16 Additionally, pembrolizumab could be a cost-effective strategy for treating patients  
17 with r/mHNSCC in developed countries with WTP thresholds greater than US\$80,000.  
18 Finally, although PSA can directly reflect the influence of model uncertainty on the  
19 results, it generally assumes that the parameters are independent of each other, which  
20 may affect the credibility of the results of pharmacoeconomic evaluation. Considering  
21 that the results are still stable when the random simulations are carried out for 1,000  
22 times, we believe that are credible.

23 Despite the above limitations, we still believe that our analysis is reasonable. The  
24 analysis was based on China Guidelines for Pharmacoeconomic Evaluations and  
25 Manual<sup>28</sup> and joint recommendations of Cost-Effectiveness in Health and Medicine.<sup>29</sup>  
26 Furthermore, extensive sensitivity analyses presented in this manuscript were  
27 performed to evaluate uncertainty on the outcomes. In conclusion, although  
28 pembrolizumab improves overall survival in patients with r/mHNSCC, this therapy is  
29 not a cost-effective strategy compared with standard therapy in China.

1  
2  
3  
4 15 2 **Author affiliations**

6 3 <sup>1</sup> Department of Pharmacy, Institute of Cancer Research and Basic Medical Sciences of  
7 4 Chinese Academy of Sciences, Cancer Hospital of University of Chinese Academy of  
8 5 Sciences, Zhejiang Cancer Hospital, Hangzhou, China

9 6 <sup>2</sup> Key Laboratory of Head and Neck Translational Research of Zhejiang Province,  
10 7 Institute of Cancer Research and Basic Medical Sciences of Chinese Academy of  
11 8 Sciences, Cancer Hospital of University of Chinese Academy of Sciences, Zhejiang  
12 9 Cancer Hospital, Hangzhou, China

13 10 **Contributors** Study conception and design: WX, HD and GY; Acquisition of data: QF,  
14 11 XZ, YT and GX; Analysis and interpretation of data: WX and HD; Drafting of  
15 12 manuscript: WX and GY; All authors revised the first draft and agreed with the final  
16 13 version.

17 14 **Funding** This research was supported by Natural Science Foundation of Zhejiang  
18 15 Province (LQ18H160018) and Natural Science Foundation of China (81903898).

19 16 **Competing interests** None declared.

20 17 **Patient consent** Not required

21 18 **Provenance and peer review** Not commissioned; externally peer reviewed.

22 19 **Data sharing statement** No additional data available.

23 20  
24 21 **REFERENCES**

- 25 22 1. Ferlay J, Soerjomataram I, Dikshit R, et al. Cancer incidence and mortality worldwide: sources,  
26 23 methods and major patterns in GLOBOCAN 2012. *Int J Cancer* 2015;136:E359-86. doi:  
27 24 10.1002/ijc.29210 [published Online First: 2014/09/16]
- 28 25 2. Fitzmaurice C, Allen C, Barber RM, et al. Global, Regional, and National Cancer Incidence,  
29 26 Mortality, Years of Life Lost, Years Lived With Disability, and Disability-Adjusted Life-years  
30 27 for 32 Cancer Groups, 1990 to 2015: A Systematic Analysis for the Global Burden of Disease  
31 28 Study. *JAMA Oncol* 2017;3:524-48. doi: 10.1001/jamaoncol.2016.5688 [published Online First:  
32 29 2016/12/06]
- 33 30 3. Beitler JJ, Zhang Q, Fu KK, et al. Final results of local-regional control and late toxicity of  
34 31 RT0G 9003: a randomized trial of altered fractionation radiation for locally advanced head and  
35 32 neck cancer. *Int J Radiat Oncol Biol Phys* 2014;89:13-20. doi: 10.1016/j.ijrobp.2013.12.027  
36 33 [published Online First: 2014/03/13]



- 1  
2  
3 1 4. Ang KK, Zhang Q, Rosenthal DI, et al. Randomized phase III trial of concurrent accelerated  
4 2 radiation plus cisplatin with or without cetuximab for stage III to IV head and neck carcinoma:  
5 3 RTOG 0522. *J Clin Oncol* 2014;32:2940-50. doi: 10.1200/jco.2013.53.5633 [published Online  
6 4 First: 2014/08/27]
- 7 5 5. Vermorken JB, Specenier P. Optimal treatment for recurrent/metastatic head and neck cancer.  
8 6 *Ann Oncol* 2010;21 Suppl 7:vii252-61. doi: 10.1093/annonc/mdq453 [published Online First:  
9 7 2010/10/15]
- 10 8 6. Stewart JS, Cohen EE, Licitra L, et al. Phase III study of gefitinib compared with intravenous  
11 9 methotrexate for recurrent squamous cell carcinoma of the head and neck [corrected]. *J Clin  
12 10 Oncol* 2009;27:1864-71. doi: 10.1200/jco.2008.17.0530 [published Online First: 2009/03/18]
- 13 11 7. Argiris A, Ghebremichael M, Gilbert J, et al. Phase III randomized, placebo-controlled trial of  
14 12 docetaxel with or without gefitinib in recurrent or metastatic head and neck cancer: an eastern  
15 13 cooperative oncology group trial. *J Clin Oncol* 2013;31:1405-14. doi:  
16 14 10.1200/jco.2012.45.4272 [published Online First: 2013/03/06]
- 17 15 8. Soulieres D, Faivre S, Mesia R, et al. Buparlisib and paclitaxel in patients with platinum-  
18 16 pretreated recurrent or metastatic squamous cell carcinoma of the head and neck (BERIL-1): a  
19 17 randomised, double-blind, placebo-controlled phase 2 trial. *Lancet Oncol* 2017;18:323-35. doi:  
20 18 10.1016/s1470-2045(17)30064-5 [published Online First: 2017/01/31]
- 21 19 9. Vermorken JB, Trigo J, Hitt R, et al. Open-label, uncontrolled, multicenter phase II study to  
22 20 evaluate the efficacy and toxicity of cetuximab as a single agent in patients with recurrent and/or  
23 21 metastatic squamous cell carcinoma of the head and neck who failed to respond to platinum-  
24 22 based therapy. *J Clin Oncol* 2007;25:2171-7. doi: 10.1200/jco.2006.06.7447 [published Online  
25 23 First: 2007/06/01]
- 26 24 10. Motzer RJ, Tannir NM, McDermott DF, et al. Nivolumab plus Ipilimumab versus Sunitinib in  
27 25 Advanced Renal-Cell Carcinoma. *N Engl J Med* 2018;378:1277-90. doi:  
28 26 10.1056/NEJMoa1712126 [published Online First: 2018/03/22]
- 29 27 11. Vaughn DJ, Bellmunt J, Fradet Y, et al. Health-Related Quality-of-Life Analysis From  
30 28 KEYNOTE-045: A Phase III Study of Pembrolizumab Versus Chemotherapy for Previously  
31 29 Treated Advanced Urothelial Cancer. *J Clin Oncol* 2018;36:1579-87. doi:  
32 30 10.1200/jco.2017.76.9562 [published Online First: 2018/03/29]
- 33 31 12. Carlino MS, Long GV, Schadendorf D, et al. Outcomes by line of therapy and programmed  
34 32 death ligand 1 expression in patients with advanced melanoma treated with pembrolizumab or  
35 33 ipilimumab in KEYNOTE-006: A randomised clinical trial. *Eur J Cancer* 2018;101:236-43. doi:  
36 34 10.1016/j.ejca.2018.06.034 [published Online First: 2018/08/11]
- 37 35 13. Mok TSK, Wu YL, Kudaba I, et al. Pembrolizumab versus chemotherapy for previously  
38 36 untreated, PD-L1-expressing, locally advanced or metastatic non-small-cell lung cancer  
39 37 (KEYNOTE-042): a randomised, open-label, controlled, phase 3 trial. *Lancet* 2019;393:1819-  
40 38 30. doi: 10.1016/s0140-6736(18)32409-7 [published Online First: 2019/04/09]
- 41 39 14. Cohen EEW, Soulieres D, Le Tourneau C, et al. Pembrolizumab versus methotrexate, docetaxel,  
42 40 or cetuximab for recurrent or metastatic head-and-neck squamous cell carcinoma (KEYNOTE-  
43 41 040): a randomised, open-label, phase 3 study. *Lancet* 2019;393:156-67. doi: 10.1016/s0140-  
44 42 6736(18)31999-8 [published Online First: 2018/12/05]
- 45 43 15. A L-C, D F, JA D, et al. Fulvestrant 500 mg Versus Anastrozole 1 mg for the First-Line  
46 44 Treatment of Advanced Breast Cancer: Overall Survival Analysis From the Phase II FIRST

- 1  
2  
3  
4 1 Study. *J Clin Oncol* 2015;33:3781-7.  
5 2 16. JR B. Markov models in medical decision making: a practical guide. *Med decis making*  
6 3 1993;13:322-38.  
7 4 17. TJ H, L H, BJ M, et al. Bevacizumab in treatment of high-risk ovarian cancer--a cost-  
8 5 effectiveness analysis. *The oncologist* 2014;19:523-7.  
9 6 18. Huang J, Liao W, Zhou J, et al. Cost-effectiveness analysis of adjuvant treatment for resected  
10 7 pancreatic cancer in China based on the ESPAC-4 trial. *Cancer Manag Res* 2018;10:4065-72.  
11 8 doi: 10.2147/cmar.s172704 [published Online First: 2018/10/17]  
12 9 19. Wu B, Yao Y, Zhang K, et al. RAS testing and cetuximab treatment for metastatic colorectal  
13 10 cancer: a cost-effectiveness analysis in a setting with limited health resources. *Oncotarget*  
14 11 2017;8:71164-72. doi: 10.18632/oncotarget.17029 [published Online First: 2017/10/21]  
15 12 20. Wu B, Zhang Q, Sun J. Cost-effectiveness of nivolumab plus ipilimumab as first-line therapy  
16 13 in advanced renal-cell carcinoma. *J Immunother Cancer* 2018;6:124. doi: 10.1186/s40425-018-  
17 14 0440-9 [published Online First: 2018/11/22]  
18 15 21. Wu B, Dong B, Xu Y, et al. Economic evaluation of first-line treatments for metastatic renal  
19 16 cell carcinoma: a cost-effectiveness analysis in a health resource-limited setting. *PLoS One*  
20 17 2012;7:e32530. doi: 10.1371/journal.pone.0032530 [published Online First: 2012/03/14]  
21 18 22. Wu B, Ye M, Chen H, et al. Costs of trastuzumab in combination with chemotherapy for HER2-  
22 19 positive advanced gastric or gastroesophageal junction cancer: an economic evaluation in the  
23 20 Chinese context. *Clin Ther* 2012;34:468-79. doi: 10.1016/j.clinthera.2012.01.012 [published  
24 21 Online First: 2012/02/14]  
25 22 23. Zhang PF, Xie D, Wen F, et al. Lenalidomide plus rituximab Vs rituximab alone in relapsed or  
26 23 refractory indolent lymphoma: A cost-effectiveness analysis. *Cancer Med* 2020 doi:  
27 24 10.1002/cam4.3121 [published Online First: 2020/06/04]  
28 25 24. Hannouf MB, Sehgal C, Cao JQ, et al. Cost-effectiveness of adding cetuximab to platinum-  
29 26 based chemotherapy for first-line treatment of recurrent or metastatic head and neck cancer.  
30 27 *PLoS One* 2012;7:e38557. doi: 10.1371/journal.pone.0038557 [published Online First:  
31 28 2012/06/30]  
32 29 25. Wan N, Zhang TT, Hua SH, et al. Cost-effectiveness analysis of pembrolizumab plus  
33 30 chemotherapy with PD-L1 test for the first-line treatment of NSCLC. *Cancer Med* 2020;9:1683-  
34 31 93. doi: 10.1002/cam4.2793 [published Online First: 2020/01/17]  
35 32 26. Georgieva M, da Silveira Nogueira Lima JP, Aguiar P, Jr., et al. Cost-effectiveness of  
36 33 pembrolizumab as first-line therapy for advanced non-small cell lung cancer. *Lung Cancer*  
37 34 2018;124:248-54. doi: 10.1016/j.lungcan.2018.08.018 [published Online First: 2018/10/01]  
38 35 27. Sarfaty M, Hall PS, Chan KKW, et al. Cost-effectiveness of Pembrolizumab in Second-line  
39 36 Advanced Bladder Cancer. *Eur Urol* 2018;74:57-62. doi: 10.1016/j.eururo.2018.03.006  
40 37 [published Online First: 2018/03/27]  
41 38 28. GE Liu SH, JH Wu, J Wu, L Yang, HC Li. China guidelines for pharmacoeconomic evaluations  
42 39 and manual. *Beijing: Science Press* 2015  
43 40 29. S. Shepard D. Cost-effectiveness in Health and Medicine. By M.R. Gold, J.E Siegel, L.B.  
44 41 Russell, and M.C. Weinstein (eds). New York: Oxford University Press, 1996/1999.  
45  
46  
47  
48  
49  
50  
51  
52  
53  
54  
55  
56  
57  
58  
59  
60

## 1 TABLES

2 **Table 1** Parameters for cost-effectiveness model

| Variable                        | Value  | Range  |        | Distribution | Source     |
|---------------------------------|--------|--------|--------|--------------|------------|
|                                 |        | Min    | Max    |              |            |
| <b>Transition probabilities</b> |        |        |        |              |            |
| <b>Pembrolizumab</b>            |        |        |        |              |            |
| Progression from stable state   | 0.281  | 0.225  | 0.337  | Beta         | [14]       |
| Death from stable state         | 0.079  | 0.063  | 0.095  | Beta         | [14]       |
| Mortality after progression     | 0.104  | 0.083  | 0.125  | Beta         | [14]       |
| <b>Standard chemotherapy</b>    |        |        |        |              |            |
| Progression from stable state   | 0.260  | 0.208  | 0.312  | Beta         | [14]       |
| Death from stable state         | 0.096  | 0.076  | 0.115  | Beta         | [14]       |
| Mortality after progression     | 0.140  | 0.112  | 0.168  | Beta         | [14]       |
| <b>Utilities</b>                |        |        |        |              |            |
| Stable state                    | 0.650  | 0.500  | 1.000  | Beta         | [26]       |
| Progressive state               | 0.520  | 0.200  | 0.700  | Beta         | [26]       |
| <b>Cost</b>                     |        |        |        |              |            |
| Pembrolizumab                   | 5421   | 4337   | 6506   | Gamma        | Calculated |
| Standard first                  | 1439   | 1151   | 1727   | Gamma        | Calculated |
| Standard                        | 1253   | 1002   | 1503   | Gamma        | Calculated |
| Administration                  | 13     | 10     | 15     | Gamma        | Calculated |
| Test                            | 154    | 123    | 185    | Gamma        | Calculated |
| Time Cost                       | 750    | 600    | 900    | Gamma        | Calculated |
| <b>Severe Adverse Events</b>    |        |        |        |              |            |
| Pembrolizumab                   | 1227   | 981    | 1472   | Gamma        | Calculated |
| Standard                        | 5855   | 4684   | 7027   | Gamma        | Calculated |
| Cancer progression              | 2555   | 1677   | 3620   | Gamma        | [21]       |
| Best supportive care            | 157.6  | 126.1  | 191.5  | Gamma        | [20]       |
| Terminal cancer care            | 2039.4 | 1631.5 | 2447.3 | Gamma        | [19]       |

3

## 4 FIGURE LEGENDS

5 **Figure 1** Model structure. (A) Abbreviated decision tree and Markov model; (B) Model  
6 states and transitions.

7 **Figure 2** Tornado plot of the univariate sensitivity analyses for pembrolizumab vs.  
8 standard of care therapy.

9 **Figure 3** Probabilistic sensitivity analyses for pembrolizumab vs. SOC therapy. (A)  
10 Cost-effectiveness acceptability curve; (B) cost-effectiveness plane. WTP: willingness  
11 to pay; SOC: standard of care.

1  
2  
3  
4  
5  
6  
7  
8  
9  
10  
11  
12  
13  
14  
15  
16  
17  
18  
19  
20  
21  
22  
23  
24  
25  
26  
27  
28  
29  
30  
31  
32  
33  
34  
35  
36  
37  
38  
39  
40  
41  
42  
43  
44  
45  
46  
47  
48  
49  
50  
51  
52  
53  
54  
55  
56  
57  
58  
59  
60

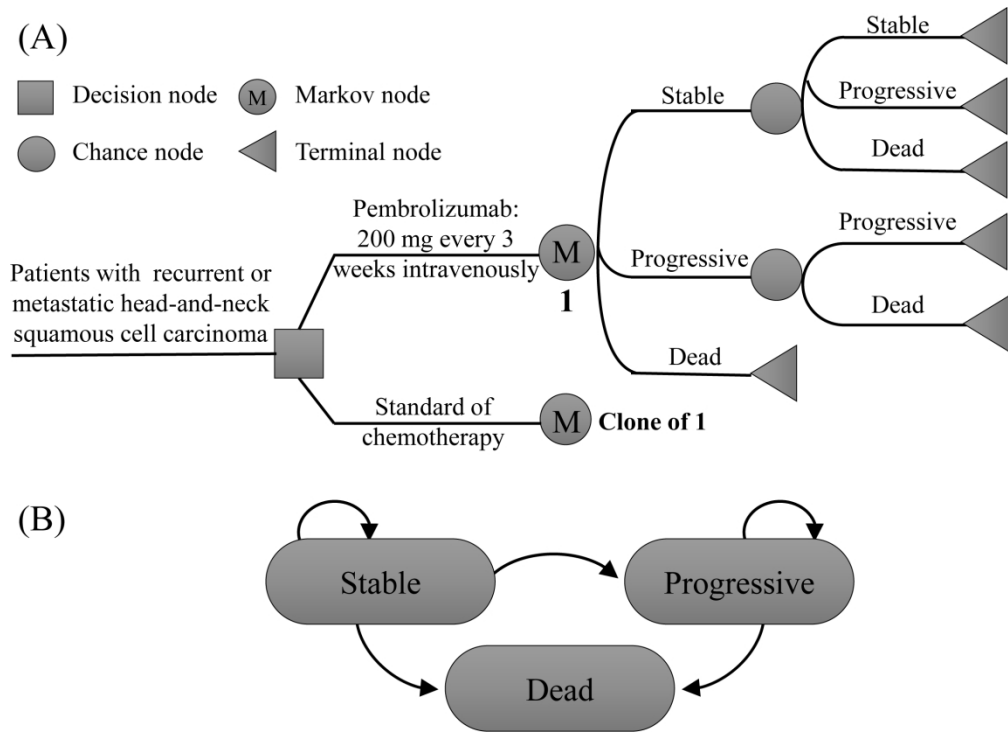

Figure 1 Model structure. (A) Abbreviated decision tree and Markov model; (B) Model states and transitions.

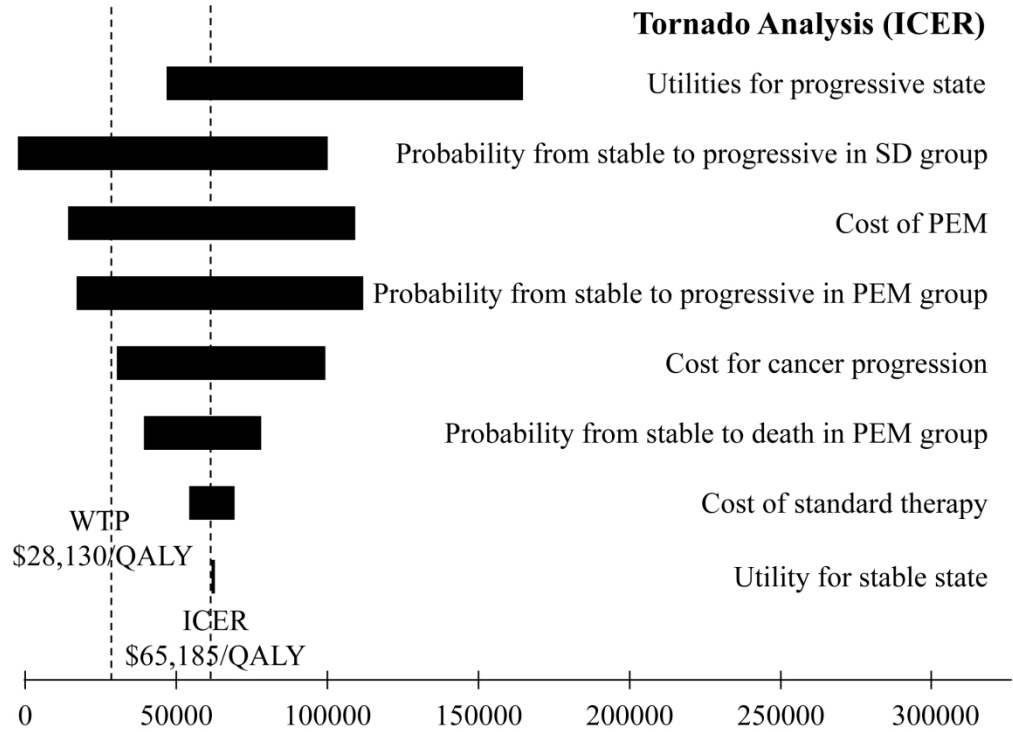

Tornado plot of the univariate sensitivity analyses for pembrolizumab vs. standard of care therapy.

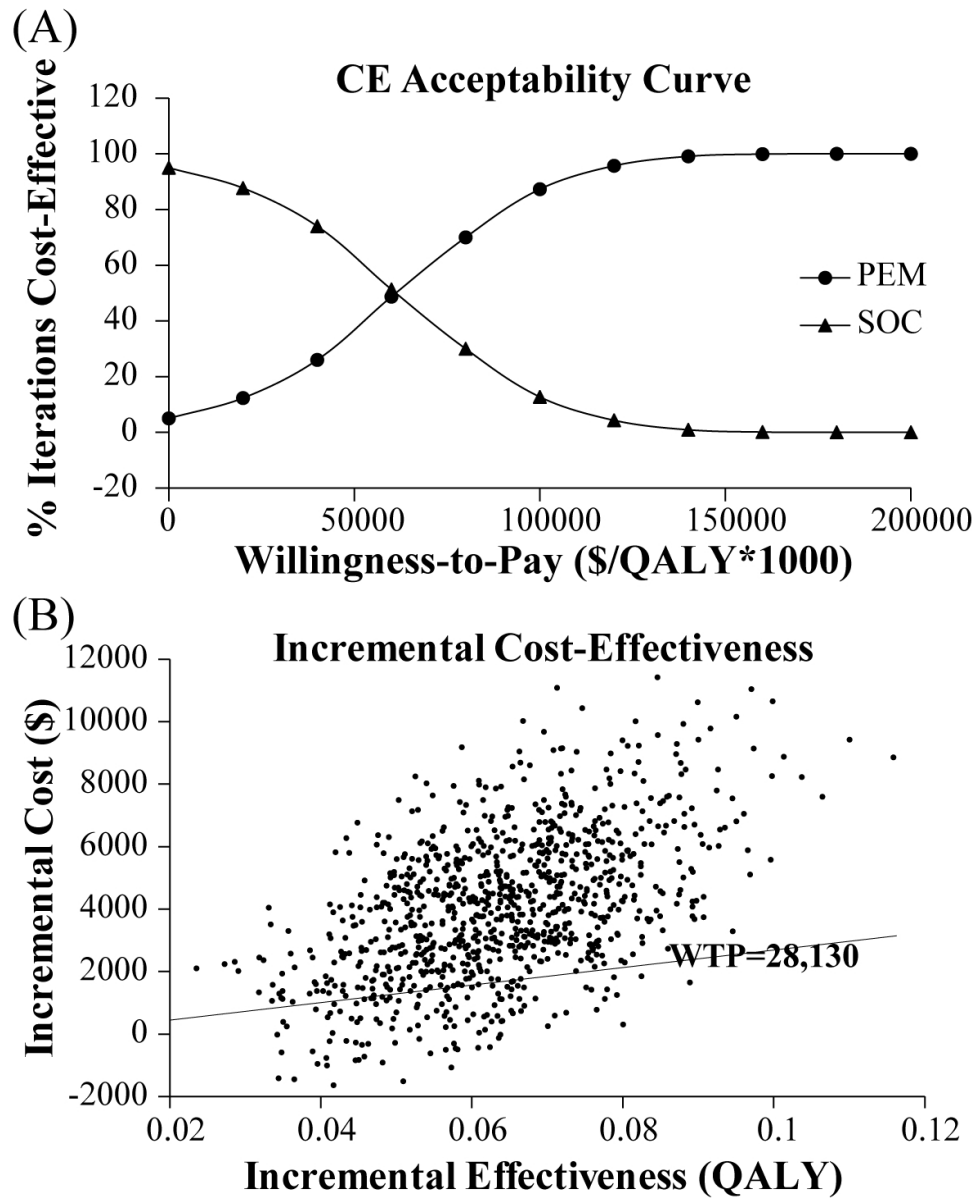

Probabilistic sensitivity analyses for pembrolizumab vs. SOC therapy. (A) Cost-effectiveness acceptability curve; (B) cost-effectiveness plane. WTP: willingness to pay; SOC: standard of care.

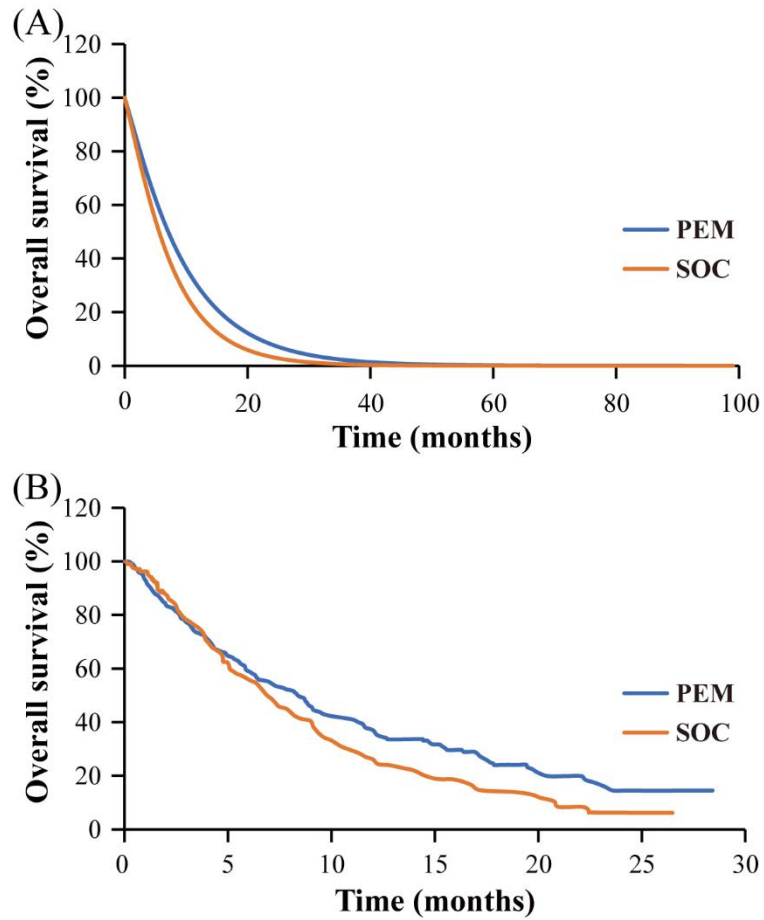

Supplementary Figure 1 Overall survival curve. (A) Survival curve from Markov model; (B) Survival curve from KEYNOTE-040 trial.
